# Supplementary material for: 3D printed objects obtained by combination of radical photopolymerization and photo sol–gel reaction: towards reinforced thermomechanical properties
Source: Royal Society of Chemistry journal article supplement (doi:10.1039/d3py00650f), 2023-01-01
Supplement: d3py00650f1.pdf [file d3py00650f1.pdf]

## *Supporting information*

### **3D printed objects obtained by combination of radical photopolymerization and photo sol-gel reaction: towards reinforced thermomechanical properties**

Lucile Halbardier, Céline Croutxé-Barghorn\*, Emile Goldbach, Anne-Sophie Schuller, Xavier Allonas

## I. Experimental section

### Nuclear magnetic resonance in liquid state – $^1\text{H-NMR}$

The sample was prepared by mixing 0.2 ml of MAPTMS in 2ml of  $\text{CDCl}_3$ . The  $^1\text{H-NMR}$  spectra was recorded at room temperature with a Bruker Advance 400 spectrometer equipped with 5-mm Z-gradient quadruple nucleus probe for routine spectroscopy. A recycling delay of 10s was selected and the spectra was acquired with 16 scans. The spectra of the MAPTMS was normalized with the residual proton signal of the solvent  $\text{CHCl}_3$  at 7.26 ppm.

### Differential Scanning Calorimetry - DSC

The glass transition temperature of the printed material  $S_{100}$  was evaluated using a DSC (DSC 25, TA Instruments). 10 to 15 mg of the cut sample were introduced in hermetically sealed pans. The heat flow was recorded between -90 and 210°C with a heating rate of 10°C/minute. Tangents of the curve were plotting to evaluate the  $T_g$ .

### Determination of Jacobs parameters for the photosensitive resins

The depth penetration of the light ( $D_p$ ) has to be superior to the layer thickness and inferior to 4 layers to limit the light diffusion and guaranty a good resolution. According to the Jacobs equation<sup>1-3</sup>, the critical energy,  $E_c$ , required to cure the resin to its gel point and the depth penetration  $D_p$  of the light were determined at 0.9  $\text{mJ}/\text{cm}^2$  and 95  $\mu\text{m}$  for  $S_{100}$  and 3.7  $\text{mJ}/\text{cm}^2$  and 126  $\mu\text{m}$  for  $S_{80}M_{20}$ .

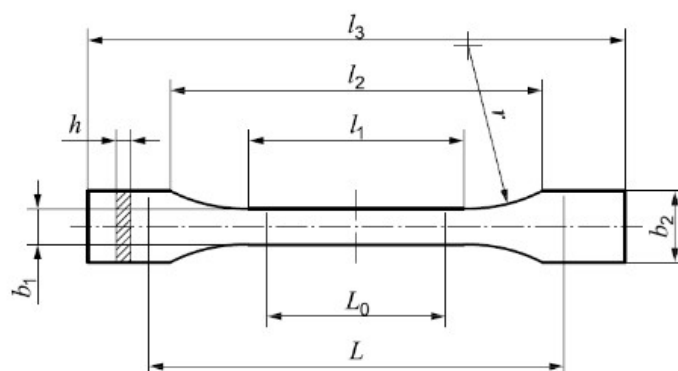

### 3D printing of the sample

Fig. S1. Dimensions of the 1BA sample from the standard ISO 527-2.

Table S1. Dimensions of the 1BA sample from the standard ISO 527-2.

| Sample                                              | 1BA                                    |
|-----------------------------------------------------|----------------------------------------|
| $l_3$ Total length                                  | $\geq 75\text{mm}$ , adjusted at 116mm |
| $l_1$ Length of the narrow part with parallel faces | 30mm                                   |
| r Radius                                            | $\geq 30\text{mm}$                     |
| Distance between wide parts                         | 58mm                                   |
| $b_1$ Width at ends                                 | 10mm                                   |
| $b_2$ Width of narrow part                          | 5mm                                    |
| h Thickness                                         | $\geq 2\text{mm}$ , adjusted at 4mm    |
| $L_0$ Reference length                              | 25mm                                   |
| L Initial distance between the jaws                 | $l_2$                                  |

## Attenuated Total Reflection - Fourier Transform Infrared Spectroscopy

Different  $\text{Conv}_{\text{C}=\text{C}}$  values were observed on the surface of the sample between the plate side where the first layer was printed and the vat side, corresponding to the last printed layer. This can be explained by a difference of light dose received by each layer. The  $\text{Conv}_{\text{C}=\text{C}}$  on the surface was determined by an average of 3 values obtained on each face and on 2 samples for each formulation. The 1BA samples were cut to assess the  $\text{Conv}_{\text{C}=\text{C}}$  on the inner part of the printed material with an average of two measurements for two samples.

## II. Additional measurements

### ATR-FTIR spectra of uncured and printed materials S<sub>100</sub>

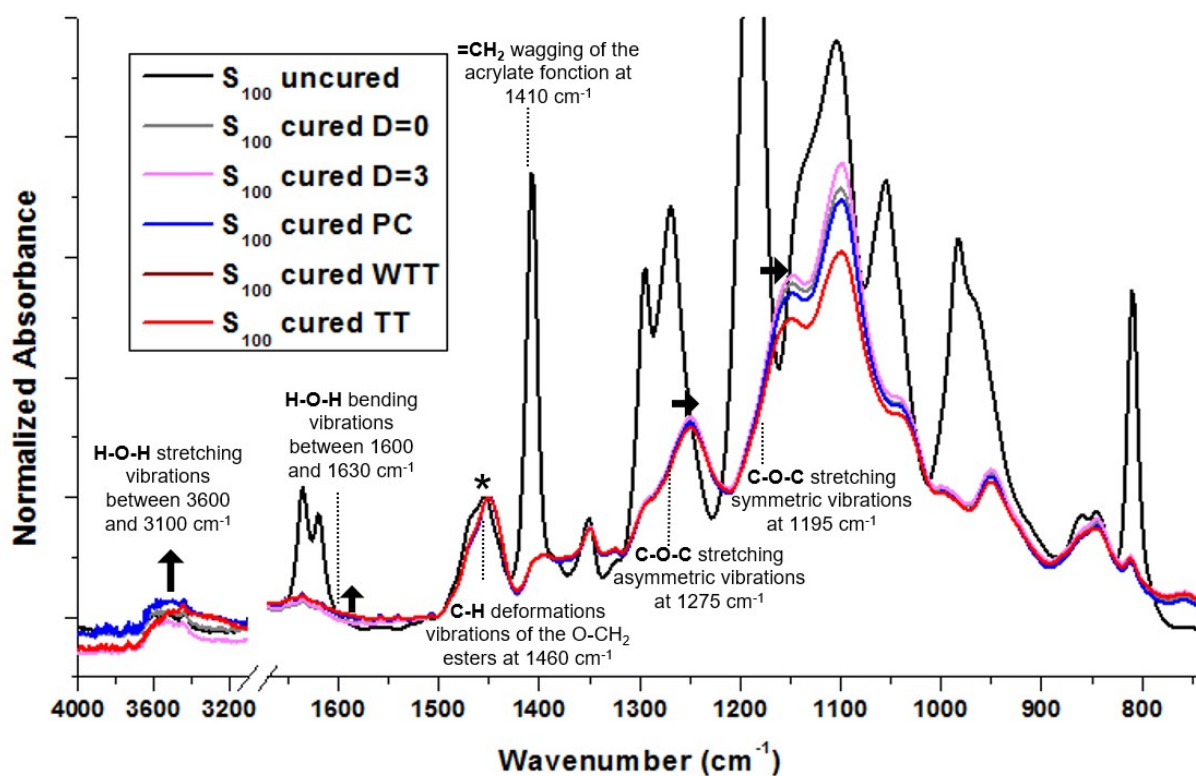

**Fig. S2.** ATR-FTIR spectra of the uncured formulation and of the center of 4mm S<sub>100</sub> printed samples. Measurements were made directly after the 3D printing (D=0), 3 days after (D=3) or after post-treatments (PC, WTT or TT). \*Spectra were normalized to the reference band at 1460 cm<sup>-1</sup>.

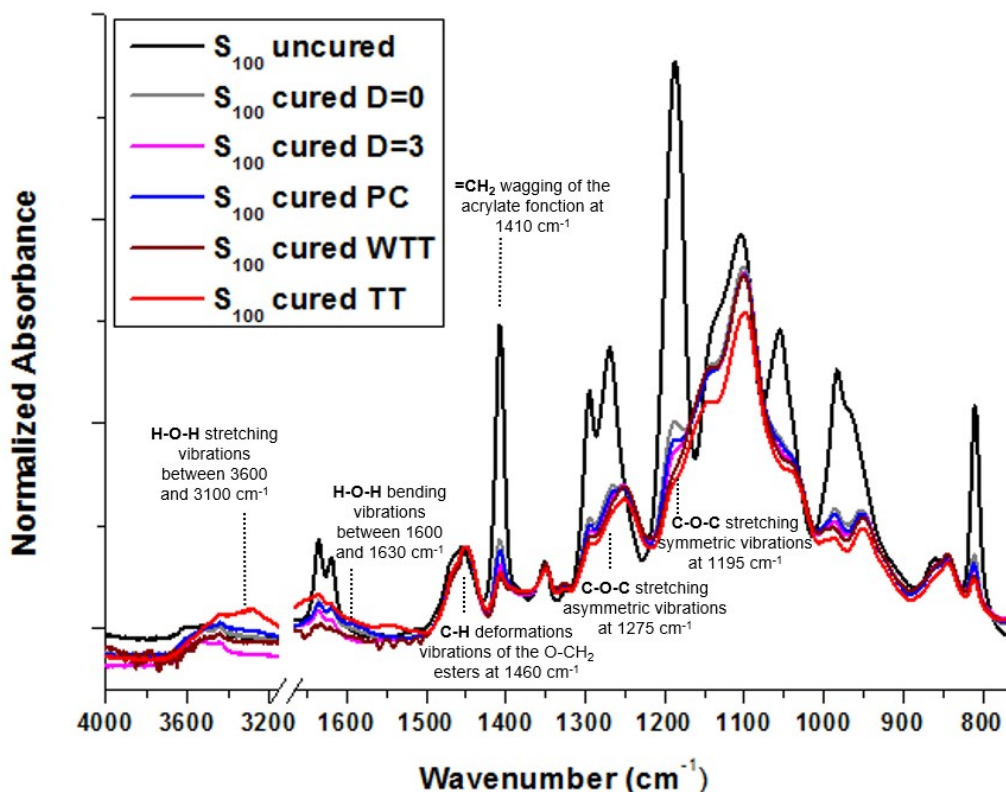

**Fig. S3.** ATR-FTIR spectra of the uncured formulation and of the last printed layer of the  $S_{100}$  printed samples. Measurements were made directly after the 3D printing ( $D=0$ ), 3 days after ( $D=3$ ) or after post-treatments (PC, WTT or TT). Spectra were normalized to the reference band at  $1460\text{ cm}^{-1}$ .

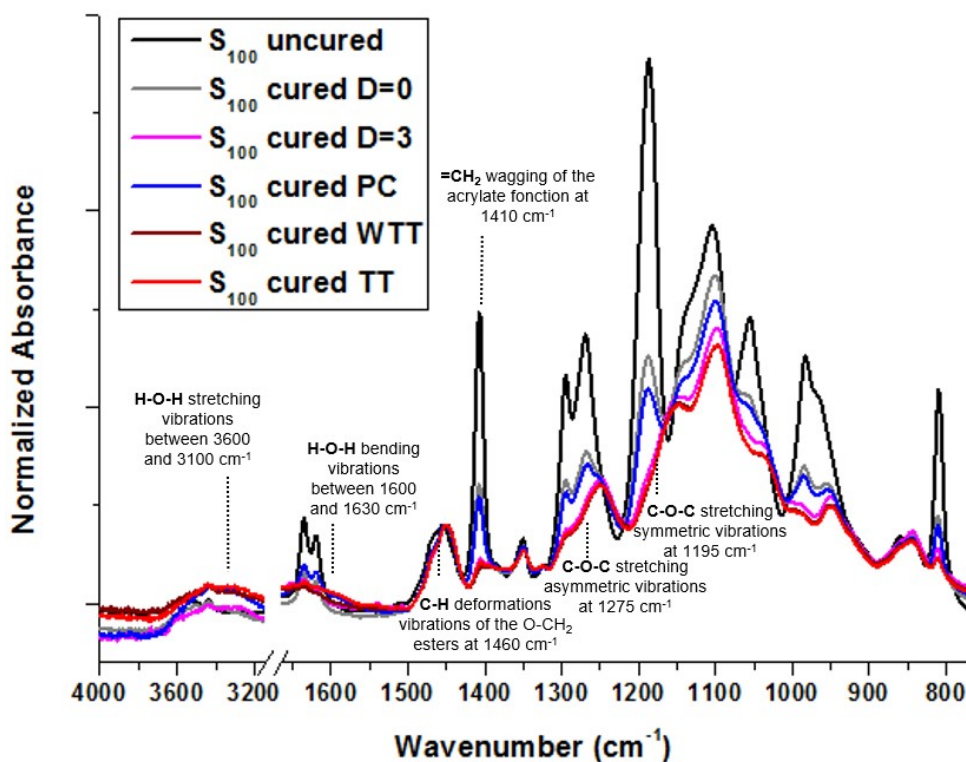

**Fig. S4.** ATR-FTIR spectra of the uncured formulation and of the first printed layer of the  $S_{100}$  printed samples. Measurements were made directly after the 3D printing ( $D=0$ ), 3 days after ( $D=3$ ) or after post-treatments (PC, WTT or TT). Spectra were normalized to the reference band at  $1460\text{ cm}^{-1}$ .

**Table S2.** Area of the ATR-FTIR band between 3100-3600  $\text{cm}^{-1}$  for the printed  $S_{100}$  sample on the outer surfaces (first and last printed layer) without PT ( $D=0$  and  $D=3$ ) and with PT (PC, WTT, TT).

| 3D printed $S_{100}$ sample | Area of the band 3100 and 3600 $\text{cm}^{-1}$ |                    |
|-----------------------------|-------------------------------------------------|--------------------|
|                             | First printed layer                             | Last printed layer |
| Without PT, $D=0$           | $2.09 \pm 0.23$                                 | $1.17 \pm 0.61$    |
| Without PT, $D=3$           | $2.30 \pm 0.29$                                 | $1.04 \pm 0.11$    |
| PC                          | $4.01 \pm 0.54$                                 | $1.74 \pm 0.45$    |
| WTT                         | $1.39 \pm 0.80$                                 | $0.43 \pm 0.23$    |
| TT                          | $2.48 \pm 0.43$                                 | $3.00 \pm 0.14$    |

### DMA investigation of the shoulder at $-80^\circ\text{C}$

Photosensitive resins composed by PEG400DA or TCDDMDA were cured with 1 wt% TPO at 385 nm and 70  $\text{mW}/\text{cm}^2$ . The respective 170  $\mu\text{m}$  thick polymer films were analyzed by DMA. The  $\tan \delta$  curves were compared to those obtained for  $S_{100}$  after 3D printing ( $D=0$ ) and after WTT+PC (Figure S3).

A shoulder appears at  $-80^\circ\text{C}$  for the cured PEG400DA and  $S_{100}$  samples. Since its presence is also observed after WTT + PC, which leads to complete acrylate conversion (Table 4), it does not correspond to uncured PEG400DA. This peak may be possibly attributed to  $\beta$  relaxation, which appears at lower temperatures than the  $\alpha$  relaxation. The relaxation temperature  $T_\alpha$  and the height of the  $\tan \delta$  curves  $H$  are reported Table S2.

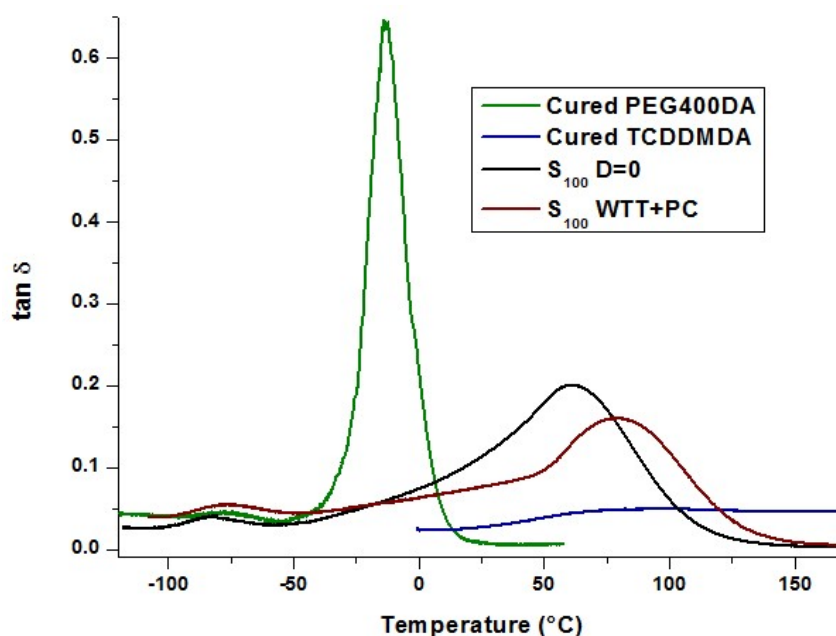

**Fig. S5.**  $\tan \delta$  of the cured monomer PEG400DA, TCDDMDA and  $S_{100}$  directly after the 3D printing ( $D=0$ ) and after WTT + PC post-treatment.

**Table S3.**  $T_\alpha$  and  $H$  for the cured monomers TCDDMDA and PEG400DA and the printed materials  $S_{100}$  and  $S_{80}M_{20}$ .

|                                     | $T_\alpha$ ( $^\circ\text{C}$ ) | $H$  |
|-------------------------------------|---------------------------------|------|
| Cured TCDDMDA                       | 97                              | 0.05 |
| Cured PEG400DA                      | -13                             | 0.60 |
| Printed material $S_{100}$          | 62                              | 0.20 |
| Printed material $S_{100}$ WTT + PC | 41                              | 0.21 |

## Integration of the area band characteristic of the methanol, water and silanol and condensed functions

The areas of the ATR-FTIR bands were normalized to a reference band at 1460 cm<sup>-1</sup> (attributed to C-H deformation vibration of the -O-CH<sub>2</sub> groups).

**Table S4.** Areas obtained after integration of the ATR-FTIR band at 3100-3600 cm<sup>-1</sup> and the shoulder at 1030 cm<sup>-1</sup> for the uncured S<sub>80</sub>M<sub>20</sub> and the inner part of the printed material without PT (D=0, D=3, D=7).

| Area of the band                        |                                               |                                                       |
|-----------------------------------------|-----------------------------------------------|-------------------------------------------------------|
|                                         | O-H stretching 3600 and 3100 cm <sup>-1</sup> | Si-O-Si deformation Shoulder at 1030 cm <sup>-1</sup> |
| Uncured S <sub>80</sub> M <sub>20</sub> | 0                                             | 0                                                     |
| Without PT, D=0                         | 1.52 ± 0.22                                   | 0.03 ± 0.01                                           |
| Without PT, D=3                         | 2.59 ± 0.71                                   | 0.08 ± 0.05                                           |
| Without PT, D=7                         | 5.23 ± 0.71                                   | 0.16 ± 0.04                                           |

## DMA of the printed material S<sub>80</sub>M<sub>20</sub> without PAG compared to S<sub>100</sub>

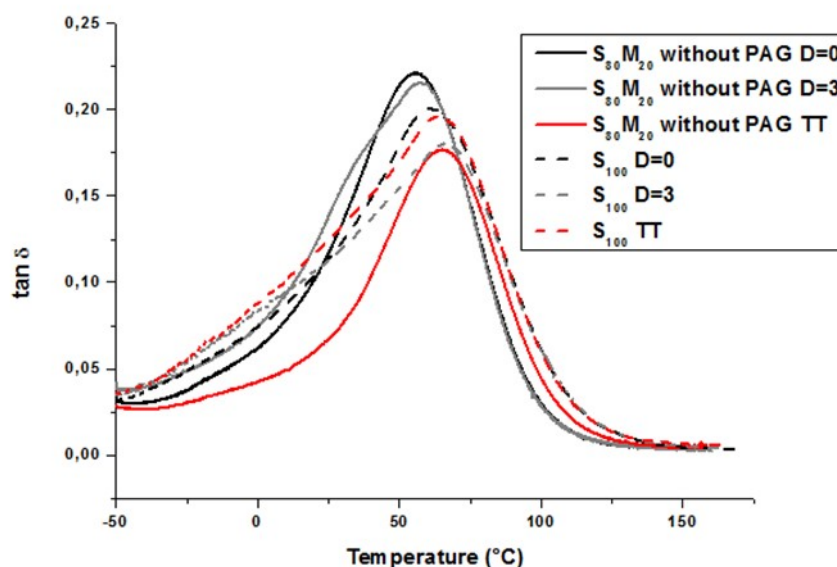

**Fig. S6.** Evolution of tan  $\delta$  measured by DMA for the S<sub>80</sub>M<sub>20</sub> samples without PAG compared to the S<sub>100</sub> samples directly after the 3D printing (D=0), 3 days later (D=3) and with a TT.

## <sup>1</sup>H-NMR of the uncured MAPTMS and estimation of the initial condensation degree

The liquid <sup>1</sup>H-NMR on the MAPTMS shows two chemical shifts at 3.55 ppm and 3.54 ppm respectively attributed to T<sup>0</sup> and T<sup>1</sup> species<sup>4,5</sup> (Figure S4). Their relative ratio was estimated from the integration of the methyl group of the methanol created during the hydrolysis and condensation at 3.46 ppm. T<sup>0</sup> and T<sup>1</sup> amount was assessed at 97.5% and 2.5% respectively. The condensation degree of the liquid MAPTMS was evaluated at 0.8% that was considered as negligible.

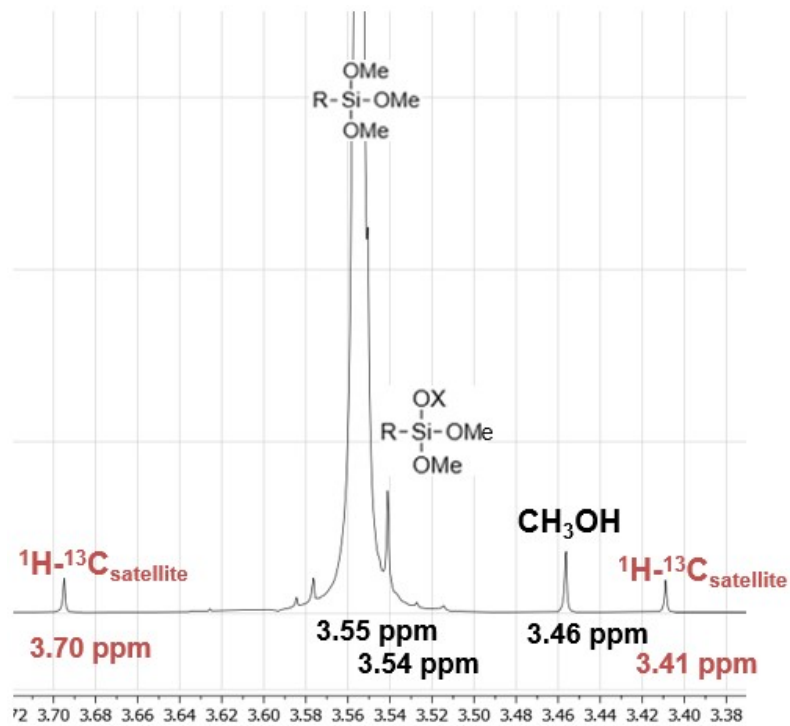

Fig. S7.  $^1\text{H}$ -NMR Spectra of the liquid MAPTMS between 3.70 and 3.38 ppm.

$$\%_{\text{CH}_3-\text{OH}} = \%_{\text{molecule}} \frac{2}{I_{\text{ref}}} * \frac{I_{\text{CH}_3-\text{OH}}}{3}$$

With  $I_{\text{CH}_3-\text{OH}}$ , the area of the chemical shift at 3.46 ppm and  $I_{\text{ref}}$ , the area of the reference chemical shift at 4.10 ppm corresponding to the methylene groups  $-(\text{CH}_2)-\text{O}-\text{C}(\text{O})-\text{C}(\text{CH}_3)=\text{CH}_2$  into the MAPTMS.

### Stabilization of the viscoelastic behaviour of the printed material $\text{S}_{80}\text{M}_{20}$ followed by DMA

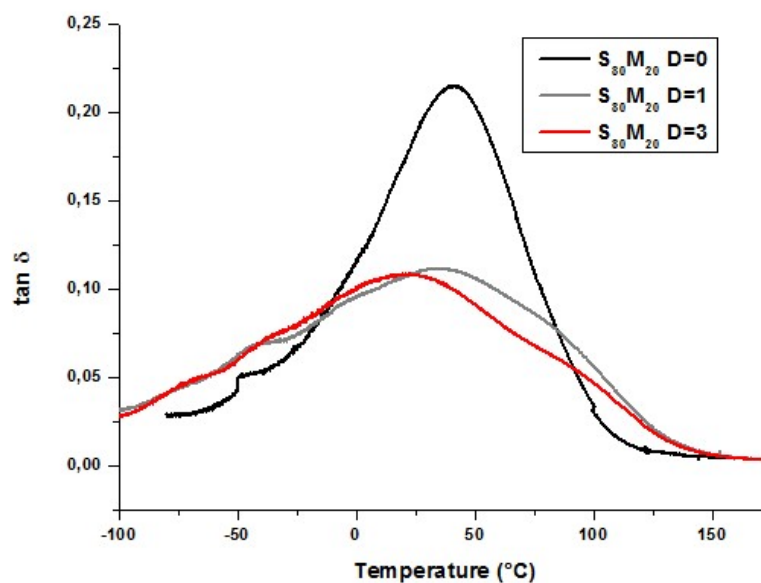

**Fig. S8.** Evolution of  $\tan \delta$  measured by DMA for  $S_{80}M_{20}$  directly after the 3D printing (D=0), 1 day after (D=1) and 3 days later (D=3).

### DMA of the printed materials $S_{80}M_{20}$ and $S_{100}$ with or without post-treatment

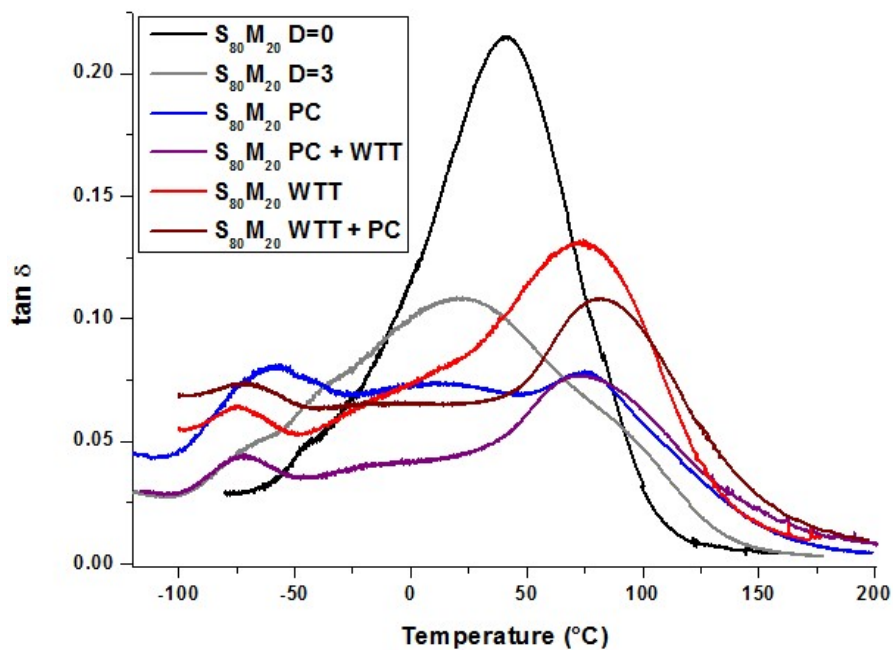

**Fig. S9.**  $\tan \delta$  curves of  $S_{80}M_{20}$  3D printed samples directly and 3 days after printing, and after various post-treatments (PC, PC + WTT, WTT, WTT + PC).

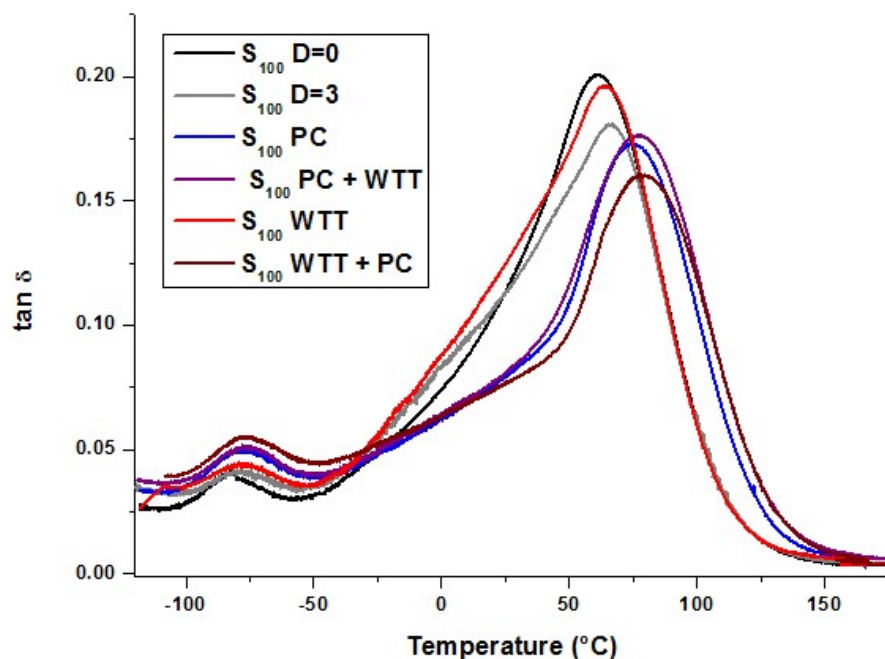

**Fig. S10.**  $\tan \delta$  curves of  $S_{100}$  3D printed samples directly and 3 days after printing, and after various post-treatments (PC, PC + WTT, WTT, WTT + PC).



## ATR-FTIR spectra of uncured and printed materials $S_{80}M_{20}$ with post-treatment

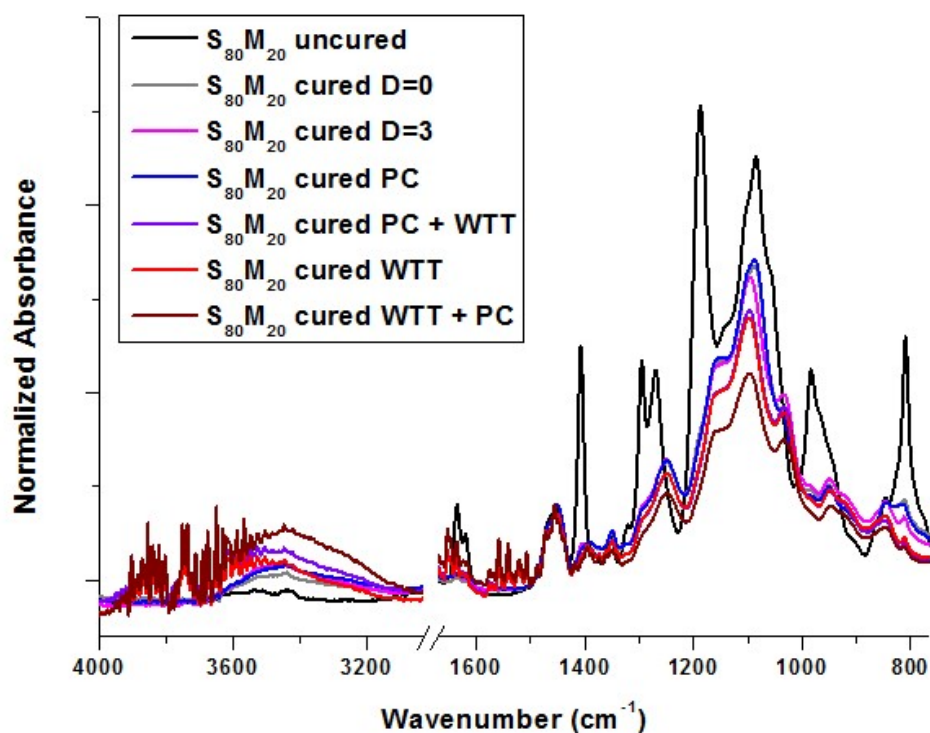

**Fig. S11.** ATR-FTIR spectra of the uncured formulation and the center of the  $S_{80}M_{20}$  printed samples. Measurements were made directly after the 3D printing (D=0), 3 days after (D=3) or after post-treatments (PC, WTT or TT). Spectra were normalized to the reference band at  $1460\text{ cm}^{-1}$ .

**Table S5.** Area obtained after integration of the ATR-FTIR band at  $3600\text{-}3100\text{ cm}^{-1}$  and the shoulder at  $1030\text{ cm}^{-1}$  for the uncured  $S_{80}M_{20}$  and on the inner part of the printed material without PT (D=0, D=3) and with a post-treatment (PC, PC+WTT, WTT, WTT+PC).

| 3D printed $S_{80}M_{20}$ sample | Area of the vibration band                          |                                                          |
|----------------------------------|-----------------------------------------------------|----------------------------------------------------------|
|                                  | O-H stretching<br>3600 and 3100<br>$\text{cm}^{-1}$ | Si-O-Si deformation<br>Shoulder at $1030\text{ cm}^{-1}$ |
| Without PT, D=0                  | $1.52 \pm 0.22$                                     | $0.03 \pm 0.01$                                          |
| Without PT, D=3                  | $2.95 \pm 0.79$                                     | $0.08 \pm 0.05$                                          |
| PC                               | $2.68 \pm 0.79$                                     | $0.03 \pm 0.15$                                          |
| PC + WTT                         | $10.99 \pm 1.41$                                    | $0.13 \pm 0.02$                                          |
| WTT                              | $10.93 \pm 1.61$                                    | $0.10 \pm 0.01$                                          |
| WTT + PC                         | $13.2 \pm 2.62$                                     | $0.15 \pm 0.02$                                          |

## $^{29}\text{Si}$ -NMR of the 3D printed material $\text{S}_{80}\text{M}_{20}$

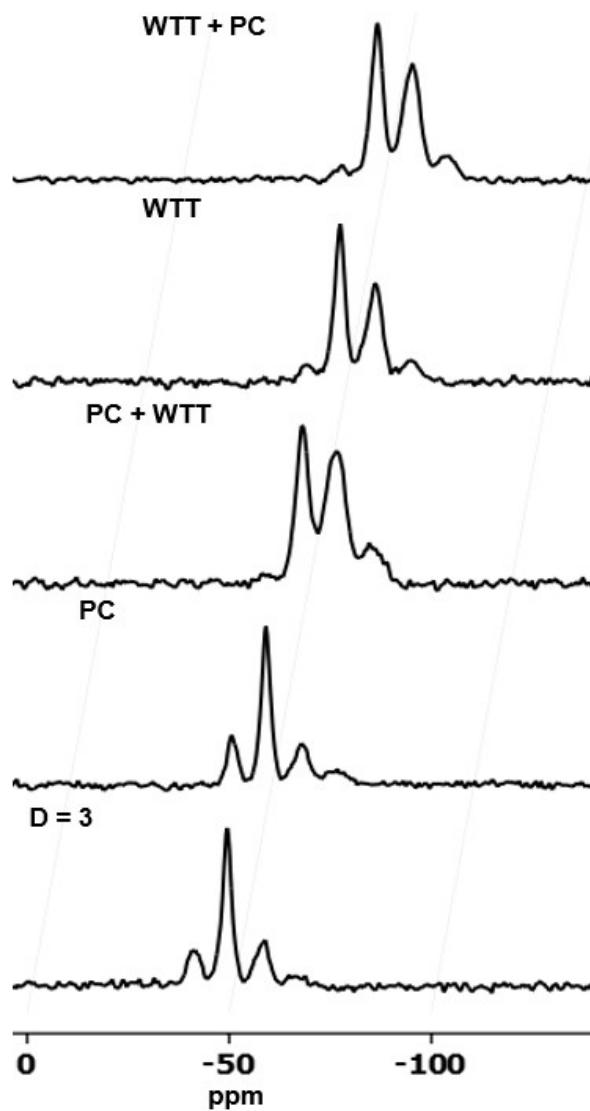

**Fig. S12.**  $^{29}\text{Si}$ -NMR spectra for the material  $\text{S}_{80}\text{M}_{20}$  3 days after the 3D printing (D=3) and after post-treatments (PC, PC + WTT, WTT, WTT + PC).

**Table S6.** Chemical shifts attributed to the different oxo-silica substructures  $\text{T}^0$ ,  $\text{T}^1$ ,  $\text{T}^2$  and  $\text{T}^3$  from the  $^{29}\text{Si}$ -NMR spectra for the material  $\text{S}_{80}\text{M}_{20}$  3 days after the 3D printing (D=3) and after post-treatments (PC, PC + WTT, WTT, WTT + PC).

| 3D printed<br>$\text{S}_{80}\text{M}_{20}$<br>samples | Chemical shift (ppm) |                      |                      |                      |
|-------------------------------------------------------|----------------------|----------------------|----------------------|----------------------|
|                                                       | $\delta(\text{T}^0)$ | $\delta(\text{T}^1)$ | $\delta(\text{T}^2)$ | $\delta(\text{T}^3)$ |
| D=3                                                   | -41.6                | -49.6                | -58.9                | -66.9                |
| PC                                                    | -41.3                | -49.8                | -58.4                | -67.6                |

|          |       |       |       |       |
|----------|-------|-------|-------|-------|
| PC+ WTT  | -40.6 | -49.6 | -58.1 | -68.2 |
| WTT      | -41.6 | -49.6 | -58.3 | -67.1 |
| WTT + PC | -40.7 | -49.5 | -58.2 | -66.8 |

**Storage and Young moduli obtained from DMA and tensile test at break for the printed materials S<sub>80</sub>M<sub>20</sub> and S<sub>100</sub> with or without post-treatment**

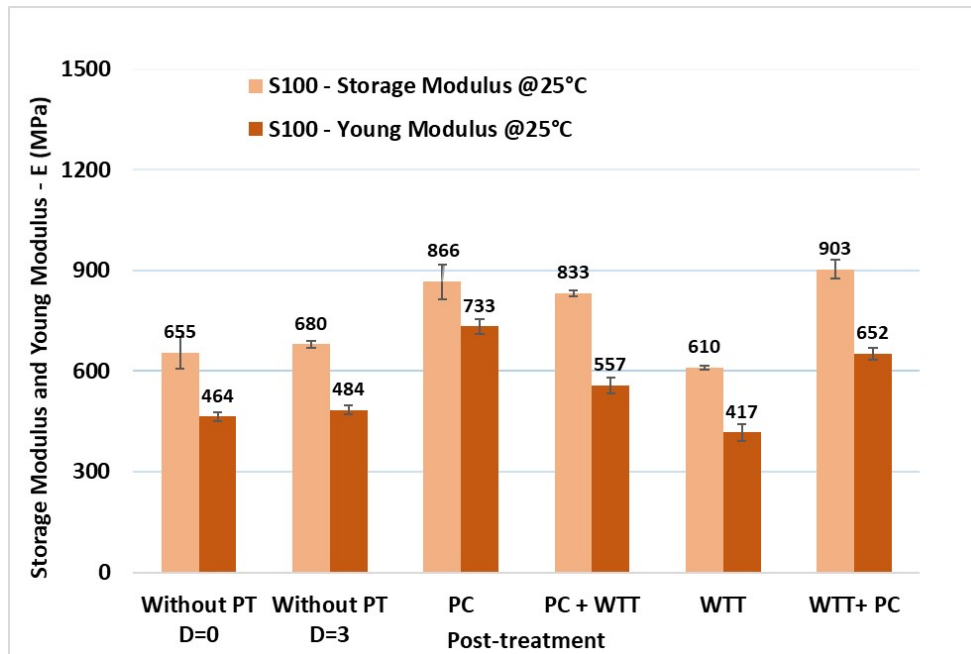

**Fig. S13.** Storage and Young moduli measured on the material S<sub>100</sub> with DMA and tensile test at break, without post-treatment (D=0, D=3) and with implementation of post-treatment directly after 3D printing (PC, PC + WTT, WTT, WTT + PC).

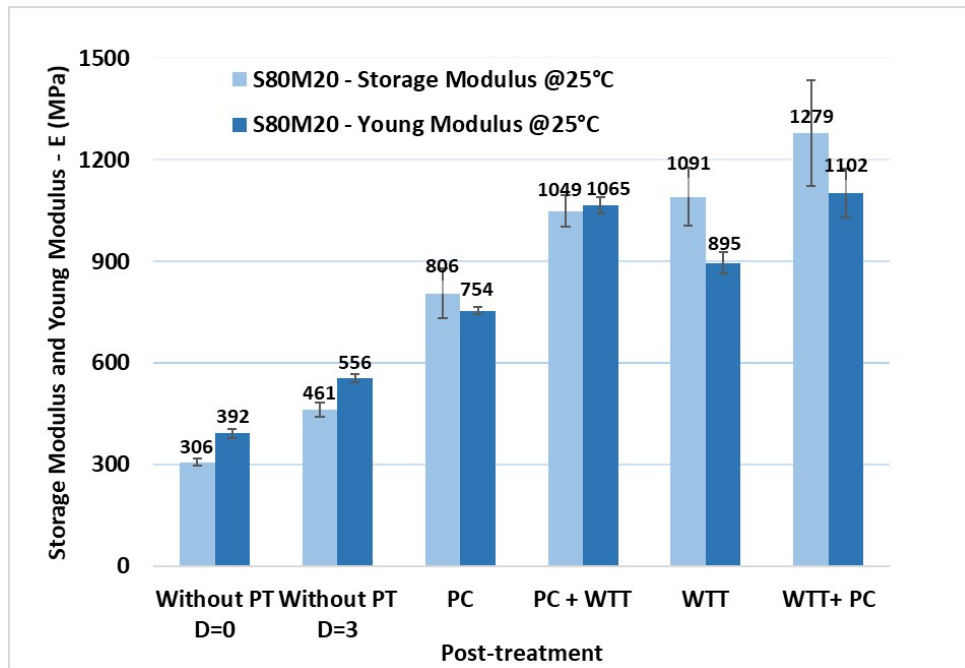

**Fig. S14.** Storage moduli and Young moduli measured on the material  $S_{80}M_{20}$  with DMA and tensile test at break, without post-treatment (D=0, D=3) and with implementation of post-treatment directly after 3D printing (PC, PC + WTT, WTT, WTT + PC).

### Tensile tests at break of $S_{100}$ and $S_{80}M_{20}$

**Table S7.** Parameters (strain and stress at break) obtained by the tensile tests at break on  $S_{100}$  (4mm thick sample) directly after the 3D printing (D=0), 3 days after the 3D printing (D=3) and after post-treatments (PC, PC + WTT, WTT, WTT + PC).

| 3D printed $S_{100}$ samples | $\epsilon$ (%) | $\sigma$ (MPa) |
|------------------------------|----------------|----------------|
| Without PT, D=0              | $5.5 \pm 0.7$  | $12.7 \pm 1.2$ |
| Without PT, D=3              | $6.3 \pm 2.3$  | $12.9 \pm 1.4$ |
| PC                           | $4.4 \pm 0.5$  | $16.4 \pm 0.9$ |
| PC + WTT                     | $5.1 \pm 1.2$  | $13.9 \pm 1.4$ |
| WTT                          | $3.8 \pm 0.4$  | $9.5 \pm 1.0$  |
| WTT + PC                     | $4.4 \pm 1.3$  | $14.5 \pm 1.9$ |

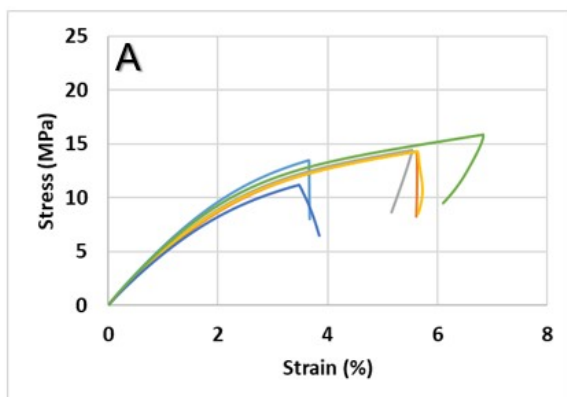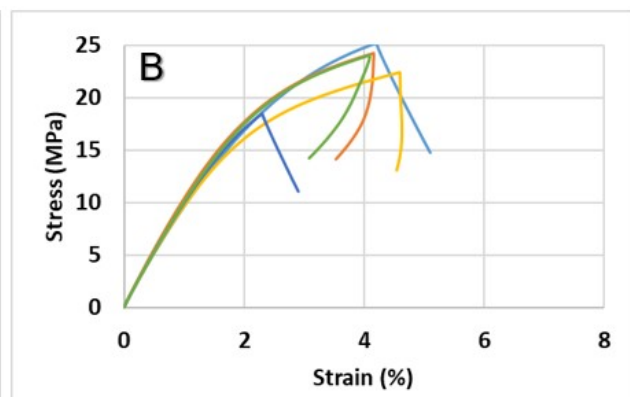

**Fig. S15.** Stress/Strain curve obtained by tensile test at break after PC + WTT for A) 3D printed sample S<sub>100</sub> and B) S<sub>80</sub>M<sub>20</sub>. Sample thickness was of 4 mm.

### Notes and references

- 1 J. P. Jacobs, *Rapid Prototyping & Manufacturing: Fundamentals of StereoLithography*, Society of Manufacturing Engineers, Michigan, 1992.
- 2 J. P. Jacobs, *Stereolithography and other RP&M Technologies: from Rapid Prototyping to Rapid Tooling*, American Society of Manufacturing Engineers, Michigan, 1995.
- 3 A. Champion, B. Metral, A.-S. Schuller, C. Croutxé-Barghorn, C. Ley, L. Halbardier and X. Allonas, *ChemPhotoChem*, 2021, **5**, 839–846.
- 4 F. de Buyl and A. Kretschmer, *J. Adhes.*, 2008, **84**, 125–142.
- 5 A. Bahadoor, A. Brinkmann and J. E. Melanson, *Anal. Chem.*, 2021, **93**, 851–858.
